# Supplementary material for: Recovery, Assessment, and Molecular Characterization of Minor Olive Genotypes in Tunisia
Source: MDPI journal article supplement (doi:10.3390/plants9030382), 2020-03-20
Supplement: s1 [file s1]

**Table S7.** List of the 12 microsatellite markers (SSR) used for molecular characterization of olive accessions. For each SSR, the identification code (SSR ID), repeat motif, primer sequence, bibliographic reference and annealing temperature (Ta) are reported.

| SSR ID  | Repeat motif                                                 | Primer sequence (5'-3')                                                 | Bibliographic reference  | Ta      |
|---------|--------------------------------------------------------------|-------------------------------------------------------------------------|--------------------------|---------|
| DCA03   | (GA) <sub>19</sub>                                           | F 5'-CCCAAGCGGAGGTGTATATTGTTAC-3'<br>R 5'-TGCTTTTGTCTGTTTGTGAGATGTTG-3' | Sefc et al. (2000)       | 50°C    |
| DCA05   | (GA) <sub>15</sub>                                           | F 5'-AACAAATCCCATACGAACTGCC-3'<br>R 5'-CGTGTGTCTGTGAAGAAAATCG-3'        | Sefc et al. (2000)       | 50°C    |
| DCA09   | (GA) <sub>23</sub>                                           | F 5'-AATCAAAGTCTTCTCTCATTTCG-3'<br>R 5'-GATCCTTCCAAAAGTATAACCTCTC-3'    | Sefc et al. (2000)       | 55°C    |
| DCA15   | (CA) <sub>3</sub> G(AC) <sub>14</sub>                        | F 5'-GATCTTGTCTGTATATCCACAC -3'<br>R 5'-TATACCTTTTCCATCTTGACGC -3'      | Sefc et al. (2000)       | 50°C    |
| DCA16   | (GT) <sub>13</sub> (GA) <sub>29</sub>                        | F 5'-TTAGGTGGGATTCTGTAGATGGTTG -3'<br>R 5'-TTTTAGGTGAGTTCATAGAATTAGC-3' | Sefc et al. (2000)       | 50°C    |
| DCA17   | (GT) <sub>9</sub> (AT) <sub>7</sub> AGATA(AGA) <sub>38</sub> | F 5'-GATCAAATTCTACCAAAAATATA -3'<br>R 5'-TAATTTTGGCACGTAGTATTGG -3'     | Sefc et al. (2000)       | 50°C    |
| DCA18   | (CA) <sub>4</sub> CT(CA) <sub>3</sub> (GA) <sub>19</sub>     | F 5'-AAGAAAGAAAAAGGCAGAATTAAGC-3'<br>R 5'-GTTTTCGTCTCTCTACATAAGTGAC-3'  | Sefc et al. (2000)       | 50°C    |
| GAPU71b | GA(AG) <sub>6</sub> (AAG) <sub>8</sub>                       | F 5'-GATCAAAGGAAGAAGGGGATAAA-3'<br>R 5'-ACAACAAATCCGTACGCTTG-3'         | Carriero et al. (2002)   | 57-60°C |
| GAPU101 | (GA) <sub>8</sub> (G) <sub>3</sub> (AG) <sub>3</sub>         | F 5'-CATGAAAGGAGGGGGACATA -3'<br>R 5'-GGCACTTGTGTGCAGATTG -3'           | Carriero et al. (2002)   | 57-60°C |
| UDO28   | (CA) <sub>23</sub> (TA) <sub>3</sub>                         | F 5'-CTGCAGCTTCTGCCCATAC-3'<br>R 5'-GCAGATCATCATTTGGCACT-3'             | Cipriani et al. (2002)   | 56°C    |
| UDO43   | (GT) <sub>12</sub>                                           | F 5'-TCGGCTTTACAACCCATTTTC-3'<br>R 5'-TGCCAATTATGGGGCTAACT-3'           | Cipriani et al. (2002)   | 57°C    |
| EMOL    | (GA) <sub>12</sub>                                           | F 5'-CTTTCCAATATGGGCTCTCG -3'<br>R 5'-ATGGCACTTACGGGAAAAA -3'           | De La Rosa et al. (2002) | 50°C    |
