# Supplementary material for: Recovery, Assessment, and Molecular Characterization of Minor Olive Genotypes in Tunisia
Source: MDPI journal article supplement (doi:10.3390/plants9030382), 2020-03-20
Supplement: s1 [file s1]

**Supplementary Table 3:** List of genotypes harboring private alleles at different SSR loci.

| Collection<br>(No. of accessions) | Genotype            | locus   | allele (bp) |
|-----------------------------------|---------------------|---------|-------------|
| NURSERIES (18)                    | CHEMLALI_SFAX1      | UDO43   | 168         |
|                                   | TAMRI_DOUIRET       | DCA17   | 109         |
|                                   |                     | DCA18   | 191         |
|                                   |                     | UDO43   | 180         |
|                                   |                     | DCA16   | 164         |
| RAS_JBAL (18)                     | HAOUARIA            | DCA17   | 165, 181    |
|                                   | NIBI1               | DCA03   | 235         |
|                                   | UNKNOWN7            | DCA18   | 187         |
| AZMOUR (13)                       | LIMI2               | UDO28   | 121         |
|                                   | UNKNOWN9            | GAPU101 | 170         |
|                                   | NEB_JEMAL2          | DCA03   | 255         |
|                                   | UNKNOWN10           | DCA16   | 186         |
|                                   | UNKNOWN11           | DCA09   | 196         |
|                                   | OCTOUBRI2           | UDO28   | 145, 161    |
| REFERENCE (IO) (26)               | CHEMLALI_ONTHA      | EMOL    | 204         |
|                                   | NEB_JEMAL_TATAOUINE | UDO43   | 170         |
|                                   | ZARRAZI_ZARZIS      | UDO28   | 119         |
|                                   | SAYALI3             | DCA16   | 178         |
|                                   |                     | UDO28   | 115, 127    |
|                                   | RKHAMI3             | UDO43   | 178         |
|                                   | MARSALINE           | GAPU101 | 214         |
