# Supplementary material for: Recovery, Assessment, and Molecular Characterization of Minor Olive Genotypes in Tunisia
Source: MDPI journal article supplement (doi:10.3390/plants9030382), 2020-03-20
Supplement: s1 [file s1]

**Table S4:** The partitioning of genetic variation within and among groups obtained with AMOVA analysis for the 4 groups of olive accessions, Reference, Azmour, Ras Jbal and Growers, based on the area of sampling.

| Source      | df | SS      | MS     | Variance components | %   |
|-------------|----|---------|--------|---------------------|-----|
| Among Pops  | 3  | 87.534  | 29.178 | 1.071***            | 11  |
| Within Pops | 73 | 654.479 | 8.965  | 8.960***            | 89  |
| Total       | 76 | 742.013 |        | 10.036***           | 100 |

P-value is based on 1,000 permutations.

df: degree of freedom; SS: sum of squares; MS: mean squares; %: percentage of total variation.
