# Supplementary material for: Recovery, Assessment, and Molecular Characterization of Minor Olive Genotypes in Tunisia
Source: MDPI journal article supplement (doi:10.3390/plants9030382), 2020-03-20
Supplement: s1 [file s1]

**Table S6.** List of olive accessions considered on this study, with sampling site, area of collection and prevalent use.

| Sampling site                                        | Name                | Origin | Use           |
|------------------------------------------------------|---------------------|--------|---------------|
| Reference collection<br>(Institut de l'Olivier) (26) | BAROUNI             | North  | Table         |
|                                                      | BELDI               | North  | Oil and table |
|                                                      | BESBESSI1           | North  | Table         |
|                                                      | BIDH_HMAM2          | Center | Oil and table |
|                                                      | CHEMCHALI_GAFSA2    | South  | Oil and table |
|                                                      | CHEMLALI_JERBA_IO   | South  | Oil           |
|                                                      | CHEMLALI_ONTHA      | South  | Oil           |
|                                                      | CHEMLALI_SFAX2      | Center | Oil           |
|                                                      | CHEMLALI_TATAOUINE1 | South  | Oil           |
|                                                      | CHEMLALI_TATAOUINE2 | South  | Oil           |
|                                                      | CHEMLALI_ZARZIS     | South  | Oil           |
|                                                      | CHETOUI2            | North  | Oil           |
|                                                      | FAKHARI             | South  | Oil           |
|                                                      | GERBOUI2            | North  | Oil and table |
|                                                      | JEMRI_BC            | South  | Oil and table |
|                                                      | JEMRI_BOUCHOUKA     | South  | Oil and table |
|                                                      | MARSALINE           | North  | Oil and table |
|                                                      | MESKI1              | North  | Table         |
|                                                      | NEB_JEMAL_TATAOUINE | North  | Oil and table |
|                                                      | OUESLATI2           | Center | Oil           |
|                                                      | RKHAM13             | North  | Oil           |
|                                                      | SAYALI3             | North  | Oil and table |
|                                                      | TOFFAHI             | South  | Oil and table |
|                                                      | TOUNSI              | North  | Table         |
|                                                      | ZALMATI             | South  | Oil           |
|                                                      | ZARRAZI_ZARZIS      | South  | Oil and table |
| Nurseries (20)                                       | ASCOLANA            | Italy  | Table         |
|                                                      | BELLA_DI_CERIGNOLA  | Italy  | Table         |
|                                                      | BIDH_HMAM1          | Center | Oil and table |
|                                                      | CHAIBI_ONTHA        | South  | Oil           |
|                                                      | CHEMCHALI_GAFSA1    | South  | Oil and table |
|                                                      | CHEMLALI_JERBA_GR   | South  | Oil           |
|                                                      | CHEMLALI_SFAX1      | Center | Oil           |
|                                                      | CHETOUI1            | North  | Oil           |
|                                                      | CAROLEA             | Italy  | Oil           |
|                                                      | FRANTOIO            | Italy  | Oil           |
|                                                      | GERBOUI1            | North  | Oil and table |
|                                                      | HAOUARIA            | North  | Oil           |
|                                                      | NDB                 | Italy  | Oil           |
|                                                      | NEB_JEMAL1          | South  | Oil and table |
|                                                      | OUESLATI1           | Center | Oil           |
|                                                      | REGUEB              | Center | Oil           |
|                                                      | RKHAM11             | North  | Oil           |
|                                                      | SAYALI1             | North  | Oil           |
|                                                      | TAMRI_DOUIRET       | South  | Oil           |
|                                                      | ZARRAZI_MABROUKA    | South  | Oil and table |
| Ras_Jbal (18)                                        | BESBESSI2           | North  | Oil           |
|                                                      | CHAMI               | North  | Oil           |
|                                                      | LIMI1               | North  | Oil           |
|                                                      | MESKI2              | North  | Table         |
|                                                      | NEB                 | North  | Oil and table |
|                                                      | NIB2                | North  | Oil           |
|                                                      | NIB1                | North  | Oil           |
|                                                      | OCTOUBRI            | North  | Oil           |
|                                                      | RAJOU1              | North  | Oil           |
|                                                      | RAJOU2              | North  | Oil           |
|                                                      | RAJOU3              | North  | Oil           |
|                                                      | UNKNOWN1            | North  | Oil           |
|                                                      | UNKNOWN2            | North  | Oil           |
|                                                      | UNKNOWN3            | North  | Oil           |
|                                                      | UNKNOWN4            | North  | Oil           |
|                                                      | UNKNOWN5            | North  | Oil           |
|                                                      | UNKNOWN6            | North  | Oil           |
|                                                      | UNKNOWN7            | North  | Oil           |
| Azmour (13)                                          | BESBESSI3           | North  | Table         |
|                                                      | CHEMLALI            | North  | Oil           |
|                                                      | CHEMLALI_AZMOUR     | North  | Oil           |
|                                                      | CHETOUL_REF         | North  | Oil           |
|                                                      | LIMI2               | North  | Oil           |
|                                                      | NEB_JEMAL2          | North  | Oil and table |
|                                                      | OCTOUBRI2           | North  | Oil           |
|                                                      | RKHAM12             | North  | Oil           |
|                                                      | SAYALI2             | North  | Oil           |

|           |       |     |
|-----------|-------|-----|
| UNKNOWN10 | North | Oil |
| UNKNOWN11 | North | Oil |
| UNKNOWN8  | North | Oil |
| UNKNOWN9  | North | Oil |

---

( ) Number of samples for each group
