# Supplementary material for: Recovery, Assessment, and Molecular Characterization of Minor Olive Genotypes in Tunisia
Source: MDPI journal article supplement (doi:10.3390/plants9030382), 2020-03-20
Supplement: s1 [file s1]

Table S1. SSR profiles of 77 Tunisian accessions. Alleles length are expressed in bp.

| Accessions          | Origin    | DCA03 | DCA05 | DCA09 | DCA15 | DCA16 | DCA17 | DCA18 | GAPU71b | GAPU101 | UDO28 | UDO43 | EMOL |     |     |     |     |     |     |     |     |     |     |     |     |
|---------------------|-----------|-------|-------|-------|-------|-------|-------|-------|---------|---------|-------|-------|------|-----|-----|-----|-----|-----|-----|-----|-----|-----|-----|-----|-----|
| NEB_JEMAL1          | NURSERIES | 239   | 253   | 202   | 206   | 162   | 186   | 246   | 246     | 124     | 160   | 117   | 117  | 181 | 185 | 123 | 144 | 190 | 200 | 137 | 147 | 176 | 216 | 190 | 190 |
| CHEMLALI_JERBA      | NURSERIES | 233   | 243   | 206   | 206   | 178   | 204   | 256   | 256     | 148     | 160   | 115   | 115  | 173 | 175 | 127 | 130 | 182 | 182 | 131 | 167 | 176 | 176 | 198 | 198 |
| CHEMLALI_SFAX1      | NURSERIES | 233   | 239   | 200   | 200   | 174   | 174   | 246   | 256     | 122     | 144   | 115   | 115  | 175 | 179 | 123 | 144 | 182 | 218 | 149 | 149 | 168 | 216 | 198 | 198 |
| CHETOU1             | NURSERIES | 233   | 239   | 206   | 206   | 194   | 194   | 246   | 246     | 122     | 172   | 117   | 117  | 175 | 179 | 121 | 127 | 182 | 218 | 123 | 149 | 176 | 216 | 190 | 190 |
| OUESLAT1            | NURSERIES | 243   | 243   | 202   | 206   | 178   | 194   | 246   | 246     | 122     | 172   | 117   | 117  | 175 | 175 | 127 | 130 | 182 | 218 | 149 | 149 | 176 | 176 | 198 | 198 |
| SAYALI1             | NURSERIES | 239   | 239   | 200   | 202   | 174   | 194   | 246   | 256     | 122     | 122   | 115   | 115  | 179 | 185 | 123 | 144 | 182 | 218 | 149 | 149 | 176 | 216 | 228 | 228 |
| CHEMCHALI_GAFSA1    | NURSERIES | 233   | 243   | 194   | 206   | 174   | 194   | 246   | 246     | 138     | 148   | 115   | 115  | 179 | 179 | 123 | 130 | 192 | 206 | 131 | 149 | 176 | 186 | 198 | 228 |
| BIDH_HMAM1          | NURSERIES | 237   | 249   | 202   | 200   | 162   | 186   | 246   | 246     | 160     | 172   | 117   | 117  | 177 | 177 | 121 | 123 | 190 | 200 | 123 | 137 | 174 | 176 | 190 | 190 |
| GERBOU1             | NURSERIES | 233   | 239   | 206   | 206   | 194   | 202   | 246   | 246     | 122     | 158   | 117   | 117  | 175 | 177 | 130 | 130 | 182 | 218 | 123 | 147 | 176 | 216 | 190 | 198 |
| RKHAM1              | NURSERIES | 233   | 239   | 206   | 206   | 194   | 202   | 246   | 246     | 122     | 158   | 117   | 117  | 175 | 177 | 130 | 130 | 182 | 218 | 123 | 147 | 176 | 216 | 190 | 198 |
| ZARRAZI_MABROUKA    | NURSERIES | 233   | 243   | 202   | 206   | 162   | 204   | 246   | 256     | 138     | 172   | 143   | 143  | 173 | 173 | 130 | 144 | 190 | 200 | 131 | 149 | 174 | 176 | 198 | 198 |
| TAMRI_DOUIRET       | NURSERIES | 239   | 239   | 194   | 202   | 178   | 204   | 246   | 256     | 122     | 164   | 109   | 115  | 179 | 191 | 123 | 130 | 182 | 198 | 131 | 131 | 176 | 180 | 198 | 198 |
| CHAIIBL_ONTA        | NURSERIES | 233   | 239   | 194   | 206   | 194   | 194   | 246   | 246     | 122     | 138   | 117   | 117  | 173 | 179 | 121 | 127 | 192 | 206 | 0   | 0   | 176 | 216 | 190 | 190 |
| NDB                 | NURSERIES | 243   | 249   | 206   | 206   | 162   | 174   | 246   | 246     | 148     | 176   | 117   | 117  | 173 | 177 | 144 | 144 | 200 | 206 | 147 | 149 | 174 | 216 | 190 | 198 |
| ASCOLANA            | NURSERIES | 233   | 249   | 206   | 208   | 194   | 206   | 246   | 246     | 124     | 152   | 115   | 117  | 165 | 173 | 123 | 144 | 198 | 200 | 123 | 131 | 176 | 216 | 198 | 198 |
| BELLA_DL_CERIGNOLA  | NURSERIES | 249   | 253   | 206   | 208   | 162   | 182   | 246   | 246     | 154     | 152   | 115   | 117  | 171 | 177 | 121 | 123 | 200 | 218 | 0   | 0   | 174 | 176 | 198 | 198 |
| CORELEA             | NURSERIES | 243   | 253   | 194   | 206   | 162   | 194   | 246   | 246     | 124     | 152   | 117   | 117  | 179 | 179 | 121 | 130 | 192 | 218 | 131 | 147 | 174 | 176 | 198 | 198 |
| FRANTOIO            | NURSERIES | 237   | 243   | 198   | 206   | 182   | 204   | 246   | 246     | 148     | 152   | 117   | 143  | 179 | 179 | 123 | 144 | 182 | 198 | 149 | 167 | 176 | 216 | 198 | 198 |
| REGUEB              | NURSERIES | 233   | 239   | 200   | 208   | 174   | 206   | 246   | 246     | 122     | 152   | 115   | 115  | 165 | 173 | 123 | 144 | 192 | 200 | 123 | 123 | 208 | 216 | 198 | 198 |
| HAOUARIA            | NURSERIES | 233   | 239   | 194   | 206   | 174   | 194   | 246   | 246     | 144     | 176   | 165   | 181  | 175 | 175 | 121 | 123 | 192 | 198 | 149 | 149 | 176 | 216 | 198 | 198 |
| NEB                 | RAS_JBAL  | 243   | 249   | 206   | 208   | 172   | 194   | 246   | 266     | 126     | 148   | 115   | 115  | 177 | 177 | 127 | 144 | 190 | 190 | 141 | 147 | 172 | 174 | 192 | 198 |
| UNKNOWN1            | RAS_JBAL  | 243   | 249   | 206   | 208   | 172   | 194   | 246   | 266     | 126     | 148   | 115   | 115  | 177 | 177 | 127 | 144 | 190 | 218 | 141 | 147 | 172 | 174 | 192 | 198 |
| MESK12              | RAS_JBAL  | 243   | 249   | 206   | 208   | 172   | 194   | 246   | 266     | 126     | 148   | 115   | 115  | 177 | 177 | 127 | 144 | 190 | 218 | 141 | 147 | 172 | 174 | 192 | 198 |
| RAJOU1              | RAS_JBAL  | 239   | 253   | 194   | 206   | 194   | 204   | 246   | 246     | 122     | 172   | 115   | 143  | 179 | 179 | 121 | 130 | 206 | 218 | 123 | 131 | 210 | 214 | 192 | 198 |
| NIB1                | RAS_JBAL  | 235   | 253   | 194   | 208   | 204   | 204   | 246   | 246     | 122     | 174   | 141   | 143  | 177 | 181 | 123 | 130 | 190 | 206 | 131 | 149 | 214 | 216 | 190 | 198 |
| RAJOU2              | RAS_JBAL  | 239   | 253   | 194   | 206   | 194   | 202   | 246   | 246     | 122     | 172   | 115   | 143  | 0   | 0   | 121 | 130 | 206 | 218 | 123 | 131 | 210 | 214 | 192 | 198 |
| LIM1                | RAS_JBAL  | 239   | 245   | 206   | 208   | 186   | 194   | 246   | 246     | 122     | 174   | 115   | 115  | 177 | 177 | 127 | 130 | 190 | 218 | 131 | 131 | 174 | 214 | 190 | 198 |
| OCTOUBR1            | RAS_JBAL  | 239   | 253   | 194   | 206   | 194   | 206   | 246   | 246     | 122     | 172   | 115   | 143  | 177 | 179 | 121 | 130 | 206 | 218 | 123 | 131 | 210 | 212 | 192 | 198 |
| CHAMI               | RAS_JBAL  | 0     | 0     | 206   | 208   | 172   | 194   | 246   | 246     | 126     | 148   | 115   | 115  | 177 | 177 | 127 | 144 | 190 | 218 | 141 | 147 | 172 | 174 | 192 | 198 |
| NIB2                | RAS_JBAL  | 243   | 249   | 206   | 208   | 172   | 194   | 246   | 266     | 126     | 148   | 115   | 115  | 177 | 177 | 127 | 144 | 190 | 218 | 141 | 147 | 172 | 174 | 192 | 198 |
| RAJOU3              | RAS_JBAL  | 239   | 249   | 194   | 206   | 194   | 206   | 246   | 246     | 122     | 172   | 115   | 143  | 177 | 179 | 121 | 130 | 206 | 218 | 123 | 131 | 210 | 214 | 192 | 198 |
| UNKNOWN2            | RAS_JBAL  | 231   | 239   | 206   | 212   | 184   | 194   | 246   | 266     | 146     | 174   | 115   | 127  | 175 | 175 | 123 | 127 | 192 | 206 | 149 | 165 | 166 | 174 | 192 | 192 |
| UNKNOWN3            | RAS_JBAL  | 231   | 239   | 198   | 206   | 184   | 194   | 246   | 246     | 122     | 172   | 0     | 0    | 171 | 179 | 127 | 127 | 190 | 206 | 139 | 149 | 166 | 214 | 192 | 192 |
| BESBESS12           | RAS_JBAL  | 243   | 249   | 206   | 208   | 172   | 194   | 246   | 266     | 126     | 148   | 115   | 115  | 177 | 177 | 127 | 144 | 190 | 218 | 141 | 147 | 172 | 174 | 192 | 198 |
| UNKNOWN4            | RAS_JBAL  | 243   | 249   | 206   | 208   | 172   | 194   | 246   | 266     | 126     | 148   | 115   | 115  | 177 | 177 | 127 | 144 | 190 | 218 | 141 | 147 | 172 | 174 | 196 | 198 |
| UNKNOWN5            | RAS_JBAL  | 231   | 249   | 202   | 206   | 186   | 194   | 246   | 270     | 162     | 176   | 115   | 115  | 177 | 185 | 123 | 144 | 190 | 218 | 137 | 147 | 176 | 208 | 196 | 198 |
| UNKNOWN6            | RAS_JBAL  | 231   | 249   | 202   | 206   | 186   | 194   | 246   | 270     | 162     | 176   | 115   | 115  | 177 | 185 | 123 | 144 | 190 | 218 | 137 | 147 | 176 | 208 | 192 | 198 |
| UNKNOWN7            | RAS_JBAL  | 249   | 253   | 206   | 206   | 162   | 194   | 246   | 266     | 126     | 176   | 115   | 115  | 177 | 187 | 121 | 144 | 200 | 218 | 123 | 147 | 172 | 210 | 192 | 192 |
| UNKNOWN8            | AZMOUR    | 231   | 243   | 206   | 206   | 162   | 186   | 246   | 270     | 148     | 154   | 115   | 115  | 181 | 181 | 121 | 123 | 190 | 200 | 139 | 149 | 174 | 214 | 192 | 192 |
| LIM2                | AZMOUR    | 239   | 243   | 206   | 206   | 172   | 194   | 246   | 246     | 158     | 172   | 115   | 115  | 179 | 185 | 121 | 121 | 198 | 206 | 121 | 121 | 174 | 212 | 192 | 192 |
| SAYAL2              | AZMOUR    | 237   | 249   | 202   | 206   | 162   | 186   | 246   | 270     | 162     | 172   | 115   | 115  | 177 | 177 | 121 | 123 | 190 | 200 | 123 | 137 | 172 | 174 | 190 | 190 |
| UNKNOWN9            | AZMOUR    | 231   | 243   | 200   | 206   | 162   | 194   | 246   | 256     | 162     | 172   | 113   | 115  | 173 | 181 | 121 | 123 | 170 | 192 | 123 | 157 | 174 | 214 | 190 | 198 |
| BESBESS3            | AZMOUR    | 243   | 249   | 206   | 208   | 172   | 194   | 246   | 266     | 126     | 148   | 115   | 115  | 177 | 177 | 127 | 144 | 190 | 218 | 141 | 147 | 172 | 174 | 192 | 198 |
| NEB_JEMAL2          | AZMOUR    | 231   | 253   | 194   | 206   | 186   | 194   | 246   | 246     | 144     | 176   | 0     | 0    | 173 | 175 | 121 | 123 | 192 | 218 | 123 | 157 | 174 | 174 | 190 | 190 |
| RKHAM12             | AZMOUR    | 231   | 253   | 194   | 206   | 172   | 184   | 246   | 266     | 124     | 146   | 113   | 115  | 173 | 179 | 123 | 130 | 192 | 218 | 123 | 149 | 166 | 210 | 190 | 190 |
| CHETOU1_REF         | AZMOUR    | 231   | 239   | 194   | 206   | 194   | 194   | 246   | 246     | 122     | 174   | 115   | 115  | 175 | 179 | 121 | 127 | 192 | 206 | 123 | 149 | 174 | 214 | 192 | 192 |
| CHEMLALI_AZMOUR     | AZMOUR    | 231   | 239   | 194   | 200   | 172   | 172   | 266   | 266     | 122     | 146   | 113   | 113  | 175 | 179 | 123 | 144 | 192 | 198 | 149 | 167 | 166 | 212 | 198 | 198 |
| UNKNOWN10           | AZMOUR    | 239   | 239   | 206   | 212   | 172   | 194   | 246   | 266     | 122     | 186   | 0     | 0    | 179 | 181 | 121 | 127 | 190 | 206 | 149 | 165 | 174 | 184 | 192 | 192 |
| CHEMLALI            | AZMOUR    | 231   | 239   | 206   | 212   | 184   | 194   | 246   | 266     | 146     | 174   | 115   | 127  | 175 | 177 | 123 | 127 | 192 | 206 | 149 | 165 | 166 | 174 | 192 | 192 |
| UNKNOWN11           | AZMOUR    | 231   | 243   | 200   | 206   | 162   | 196   | 246   | 256     | 162     | 172   | 113   | 115  | 173 | 181 | 121 | 123 | 190 | 206 | 131 | 169 | 174 | 214 | 190 | 198 |
| OCTOUBR12           | AZMOUR    | 245   | 253   | 194   | 206   | 162   | 186   | 246   | 266     | 148     | 172   | 115   | 115  | 173 | 177 | 121 | 144 | 200 | 206 | 145 | 161 | 172 | 214 | 198 | 198 |
| ZALMAT1             | IO        | 231   | 239   | 194   | 200   | 172   | 172   | 266   | 266     | 124     | 146   | 113   | 113  | 175 | 179 | 123 | 144 | 192 | 198 | 0   | 0   | 166 | 212 | 198 | 198 |
| GERBOU2             | IO        | 245   | 249   | 194   | 208   | 194   | 204   | 246   | 246     | 154     | 174   | 113   | 113  | 171 | 177 | 121 | 127 | 190 | 200 | 149 | 149 | 174 | 214 | 190 | 198 |
| CHEMLALI_ONTA       | IO        | 231   | 243   | 194   | 198   | 172   | 176   | 256   | 266     | 146     | 162   | 113   | 113  | 173 | 179 | 130 | 144 | 192 | 198 | 149 | 167 | 166 | 166 | 198 | 204 |
| NEB_JEMAL_TATAOUINE | IO        | 233   | 243   | 200   | 206   | 172   | 184   | 246   | 270     | 160     | 174   | 141   | 143  | 175 | 177 | 123 | 144 | 182 | 200 | 147 | 167 | 170 | 172 | 190 | 190 |
| OUESLAT2            | IO        | 243   | 243   | 202   | 206   | 176   | 194   | 246   | 270     | 122     | 174   | 115   | 115  | 175 | 175 | 127 | 130 | 192 | 200 | 149 | 149 | 174 | 174 | 196 | 198 |
| CHEMLALI_JERBA      | IO        | 231   | 239   | 194   | 200   | 172   | 172   | 266   | 266     | 122     | 146   | 113   | 113  | 175 | 179 | 123 | 144 | 192 | 198 | 137 | 137 | 166 | 212 | 198 | 198 |
| ZARRAZI_ZARZIS      | IO        | 243   | 249   | 206   | 206   | 162   | 172   | 246   | 246     | 148     | 17    |       |      |     |     |     |     |     |     |     |     |     |     |     |     |
