# Supplementary material for: Recovery, Assessment, and Molecular Characterization of Minor Olive Genotypes in Tunisia
Source: MDPI journal article supplement (doi:10.3390/plants9030382), 2020-03-20
Supplement: s1 [file s1]

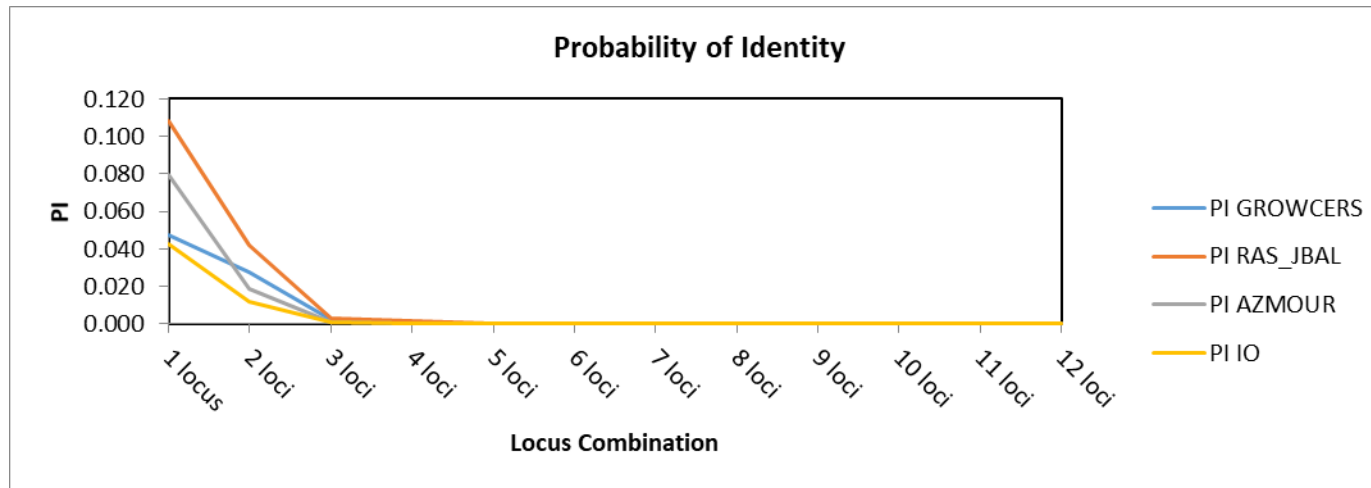

**Supplementary Figure 1:** Probability of identity for the 4 groups of olive genotypes considered in this study. A minimum of 3 microsatellite loci were needed to meet the PID threshold of  $P < 0.01$  (Waits et al., 2001).

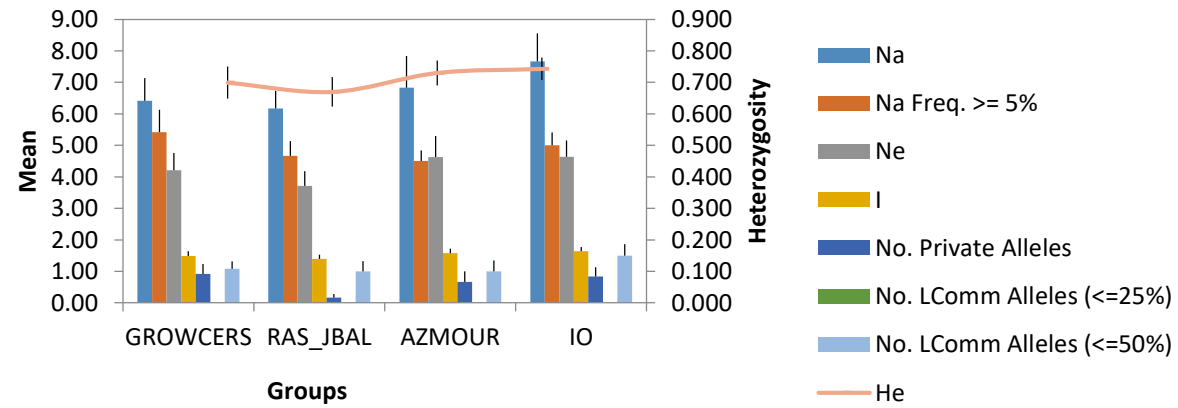

**Supplementary Figure 2:** Allelic patterns across the four groups considered in the study, based on geographic origin.

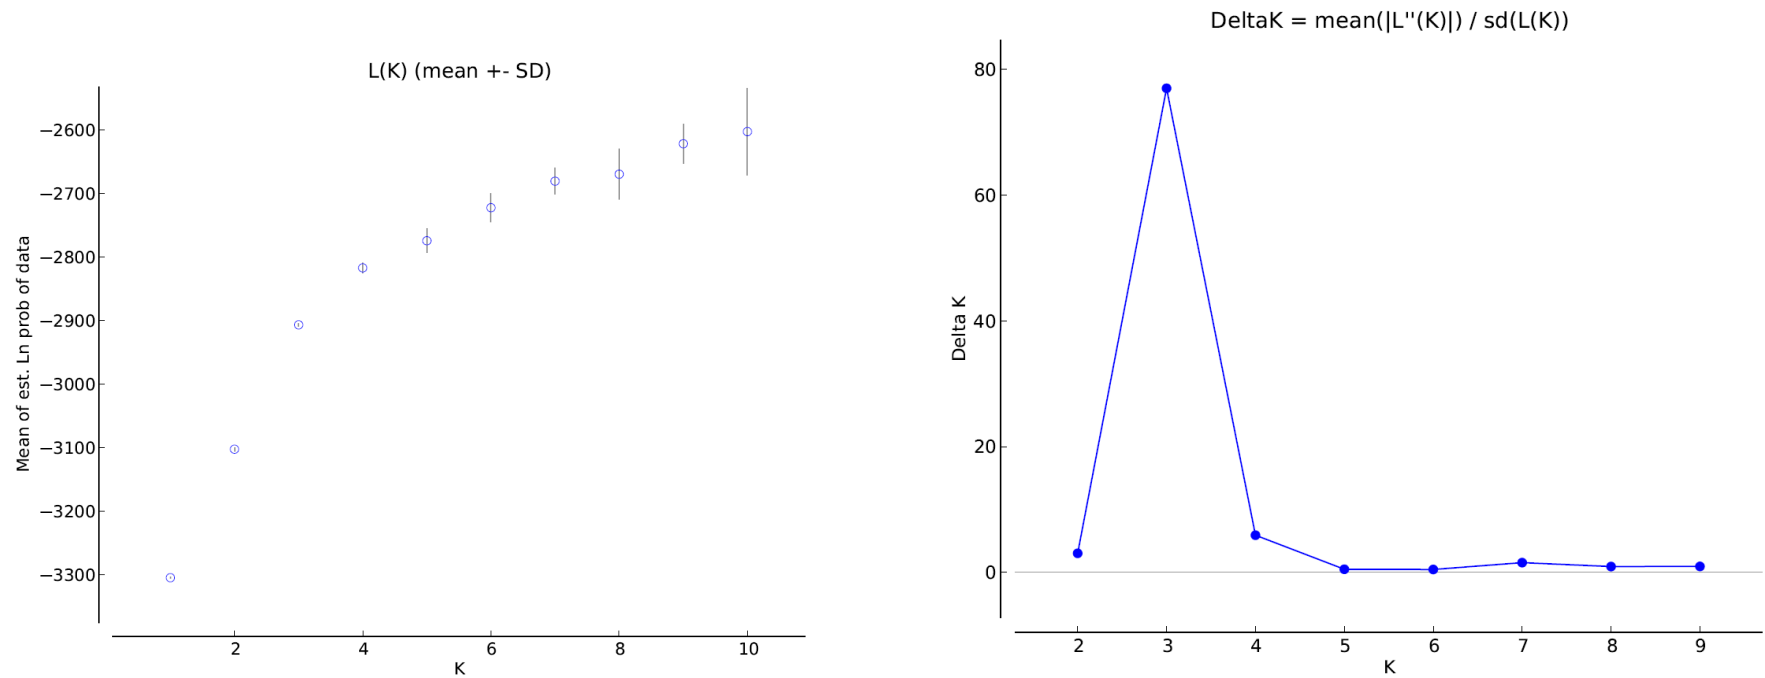

**Supplementary Figure 3:** a) Mean of estimation ln probabilistic data of Tunisian Olive samples; b) Graph of delta K values to determine the best number of populations present in olive germplasm collection. The best K was at K = 3.
