# Supplementary material for: Recovery, Assessment, and Molecular Characterization of Minor Olive Genotypes in Tunisia
Source: MDPI journal article supplement (doi:10.3390/plants9030382), 2020-03-20
Supplement: s1 [file s1]

**Table S2:** List of pairwise relatedness based on LRM estimator (Lynch and Ritland, 1999).

| <b>LRM = 0.500</b>               |                   |
|----------------------------------|-------------------|
| GERBOUI1_GR                      | RKHAMI1_GR        |
| UNKNOWN1_RJ                      | MESKI2_RJ         |
| UNKNOWN1_RJ                      | NIB2_RJ           |
| MESKI2_RJ                        | NIB2_RJ           |
| UNKNOWN1_RJ                      | BESBESSI2_RJ      |
| MESKI2_RJ                        | BESBESSI2_RJ      |
| NIB2_RJ                          | BESBESSI2_RJ      |
| UNKNOWN1_RJ                      | BESBESSI3_AZ      |
| MESKI2_RJ                        | BESBESSI3_AZ      |
| NIB2_RJ                          | BESBESSI3_AZ      |
| BESBESSI2_RJ                     | BESBESSI3_AZ      |
| ZALMATI_IO                       | CHEMLALI_SFAX2_IO |
| <b>0.500 &gt; LRM &lt; 0.374</b> |                   |
| UNKNOWN2_RJ                      | CHEMLALI_AZ       |
| UNKNOWN1_RJ                      | CHAMI_RJ          |
| MESKI2_RJ                        | CHAMI_RJ          |
| CHAMI_RJ                         | NIB2_RJ           |
| CHAMI_RJ                         | BESBESSI2_RJ      |
| CHAMI_RJ                         | BESBESSI3_AZ      |
| NEB_RJ                           | UNKNOWN1_RJ       |
| NEB_RJ                           | MESKI2_RJ         |
| NEB_RJ                           | NIB2_RJ           |
| NEB_RJ                           | BESBESSI2_RJ      |
| NEB_RJ                           | BESBESSI3_AZ      |
| CHEMLALI_AZMOUR_AZ               | CHEMLALI_SFAX2    |
| CHEMLALI_AZMOUR_AZ               | ZALMATI_IO        |
| ZALMATI_IO                       | CHEMLALI_JERBA    |
| BAROUNI_IO                       | BESBESSI1_IO      |
| NEB_RJ                           | CHAMI_RJ          |
| UNKNOWN5_RJ                      | UNKNOWN6_RJ       |
| CHETOUI_REF_AZ                   | CHETOUI2_IO       |
| OCTOUBRI_RJ                      | RAJOU3_RJ         |
| UNKNOWN1_RJ                      | UNKNOWN4_RJ       |
| MESKI2_RJ                        | UNKNOWN4_RJ       |
| NIB2_RJ                          | UNKNOWN4_RJ       |
| BESBESSI2_RJ                     | UNKNOWN4_RJ       |
| UNKNOWN4_RJ                      | BESBESSI3_AZ      |
| CHEMLALI_AZMOUR_AZ               | CHEMLALI_JERBA_IO |
| RAJOU1_RJ                        | RAJOU2_RJ         |
| CHAMI_RJ                         | UNKNOWN4_RJ       |
| NEB_RJ                           | UNKNOWN4_RJ       |

Reference (IO); Nurseries (GR); Ras\_Jbal (RJ); Azmour (AZ)
