# Supplementary material for: Recovery, Assessment, and Molecular Characterization of Minor Olive Genotypes in Tunisia
Source: MDPI journal article supplement (doi:10.3390/plants9030382), 2020-03-20
Supplement: s1 [file s1]

**Supplementary Table S5:** Pairwise population  $F_{ST}$  values that indicate the genetic differentiation between the 3 subpopulations (SP) detected by STRUCTURE at  $K = 3$ .

|     | SP1   | SP2   | SP3 |
|-----|-------|-------|-----|
| SP2 | 0.206 |       |     |
| SP3 | 0.213 | 0.080 |     |
