# Supplementary material for: Recovery, Assessment, and Molecular Characterization of Minor Olive Genotypes in Tunisia
Source: Plants (Basel). 2020 Mar 20;9(3):382. doi: 10.3390/plants9030382 (PMC7154912; doi:10.3390/plants9030382)
Supplement: Supplementary file 1 [file plants-09-00382-s001.zip]

Archive with 8 entries (8 files):
- S1 table rev..pdf
- S2 table rev..pdf
- S3 Table rev..pdf
- S4 table rev..pdf
- S5 table rev.pdf
- S6 Table rev.pdf
- S7 Table.pdf
- Supplementary Figures.pdf
